# Supplementary material for: From synthetic DNA to PCR product: detection of fungal infections using SERS
Source: Royal Society of Chemistry journal article supplement (doi:10.1039/c5fd00167f), 2015-12-24
Supplement: c5fd00167f1.pdf [file c5fd00167f1.pdf]

### Supplementary Information

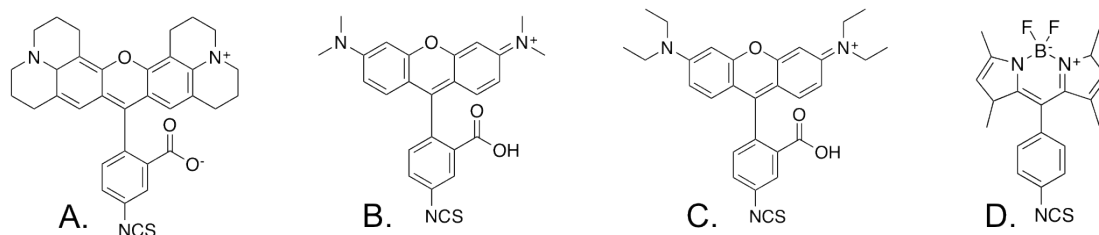

**Figure S1.** Structures of the isothiocyanate dyes used as the reporter molecule in the multiplex. A) substituted rhodamine isothiocyanate (XRITC) B) tetramethylrhodamine isothiocyanate (TRITC) C) rhodamine B isothiocyanate D) boron-dipyrromethene isothiocyanate (BODIPY-ITC)

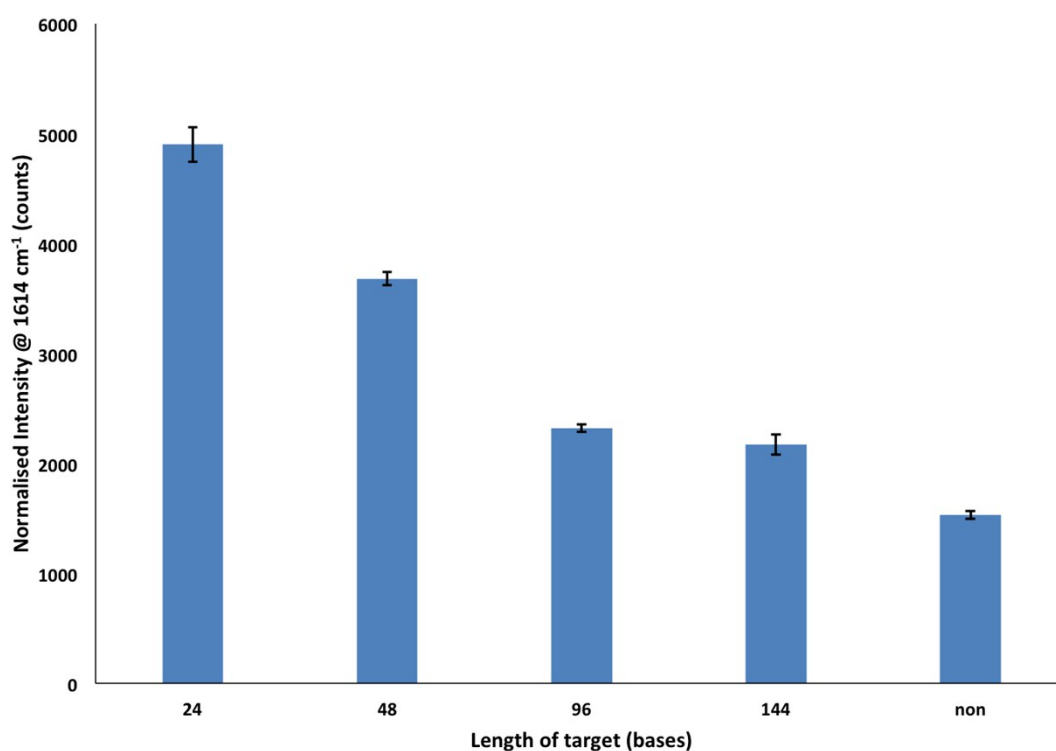

**Figure S2.** Plot showing how SERS signal decreases as the length of the target increases, emphasising the limited hybridisation of the 12 base probes to larger single stranded sequences

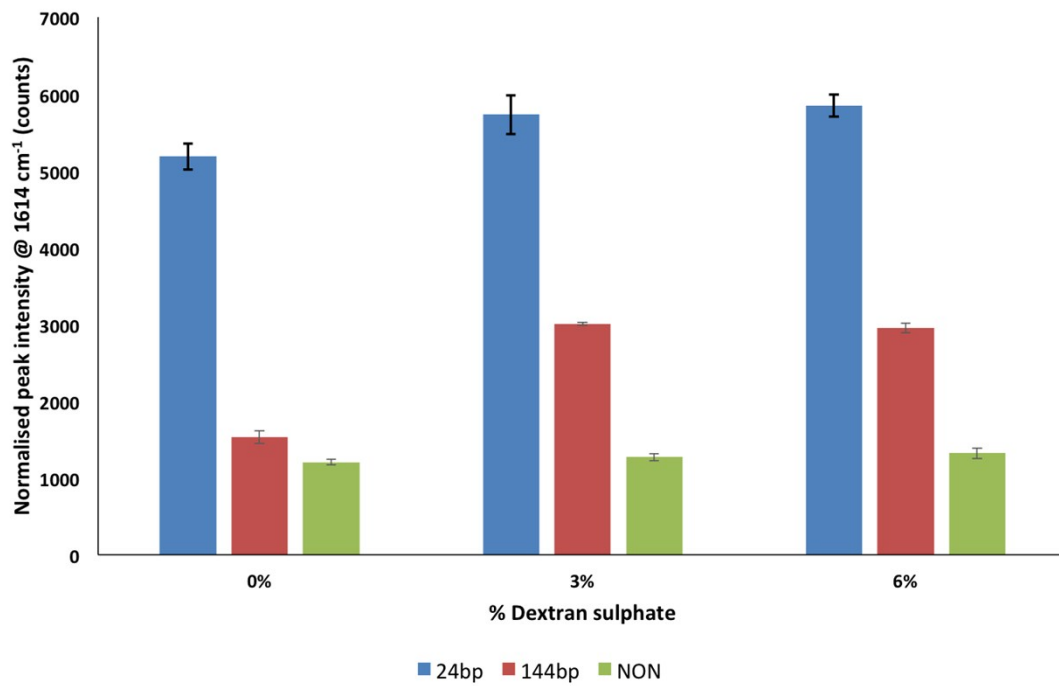

**Figure S3.** By increasing the w/v of dextran sulphate in the hybridisation it can be seen that hybridisation of the 12 base probes to the 24 and 144 base synthetic complements becomes much greater.
